# Supplementary material
Source: publisher figshare collection journal article supplement (https://sage.figshare.com/ndownloader/files/15592574)
Supplement: Supplementary file 1 [file 15592574]

## **Appendix A**

### **Topic Guide for Interviews with PLU Staff Members**

#### **Role of Staff Member**

Please describe your role in the PLU.

How long have you worked in your current role?

Are there any teaching techniques you use that are specific to the PLU?

What are the benefits and challenges of teaching staff and speech and language therapists working together?

#### **The PLU**

How does the PLU differ from a mainstream preschool setting?

Please describe the learning needs of the children attending Bees?

What are the main aims of the PLU?

How does the PLU differ to other settings you have experienced or worked in?

What are the features that define the PLU?

How do you perceive the children's outcomes might differ if they attended a mainstream preschool setting?

What resources are important in the PLU?

Given unlimited budget, what areas would you focus on expanding in the PLU?

#### **Places**

How many places are there available for children in the PLU?

What is the process for selecting children to attend the PLU?

Are there any difficulties within this process?

#### **Child Progress**

How is progress measured in the PLU?

What are your expectations for how a child might develop over the course of the year?

What benefits do you perceive the children gain from attending the PLU?

How to you set, manage and realise individual goals and targets for speech language and communication?

#### Mainstream Time

Tell me about the children spending time in the nursery.

What benefits and disadvantages are there to the children spending time in nursery, if any?

What do you think about the PLU being attached to the main school?

How do you think the PLU would be different as part of a community centre or as a stand-alone unit?

Does the PLU prepare children for school?

#### Links with Family

How does the PLU keep in touch with children's families?

How do you communicate with families regarding children's progress?

What are the benefits/challenges of this communication?

Appendix B

### **QUESTIONS ABOUT THE PLU**

**PLEASE COMPLETE THE FOLLOWING USING THE METHOD OF YOUR CHOICE:**

**Filled out and returned to [REDACTED],**

**Telephone Interview or**

**Face-to-Face Interview**

**Please aim to complete by Friday 4<sup>th</sup> July**

How long has your child been in the PLU?

Can you describe your child's talking and understanding?

How did your child get a place in the PLU?

What was the process of starting the PLU like for you and your child?

What do you think are the main aims of the PLU?

What has been the greatest benefit of your child attending the PLU?

Are there any drawbacks to being in the PLU?

Do you feel your child's talking and understanding has changed since they have been in the PLU? Please give details.

What does your child think about going to the PLU?

What do they enjoy most about being in the PLU?

Is there any part of the PLU that your child does not enjoy? If so, which bits?

How does your child feel about spending part of their session in the nursery?

What do they like about the nursery?

Is there anything they dislike about the nursery?

In what ways has the PLU prepared your child for starting school?

If you could change anything about the PLU, what would it be?

What would your advice be for other parents considering sending their child to the PLU?

**Thank you for your time.**
